# Supplementary material for: Nanotube composites: novel SiO2 coated carbon nanotubesElectronic supplementary information (ESI) available: TGA studies, SEM image of an MWNT/SiOx composite after TEM measurement, and mechanical properties. See http://www.rsc.org/suppdata/cc/b1/b109441f/
Source: Royal Society of Chemistry journal article supplement (doi:10.1039/b109441f), 2001-12-04
Supplement: b109441f.doc [file b109441f.doc]

**Supplementary Information**

- *TGA Studies*


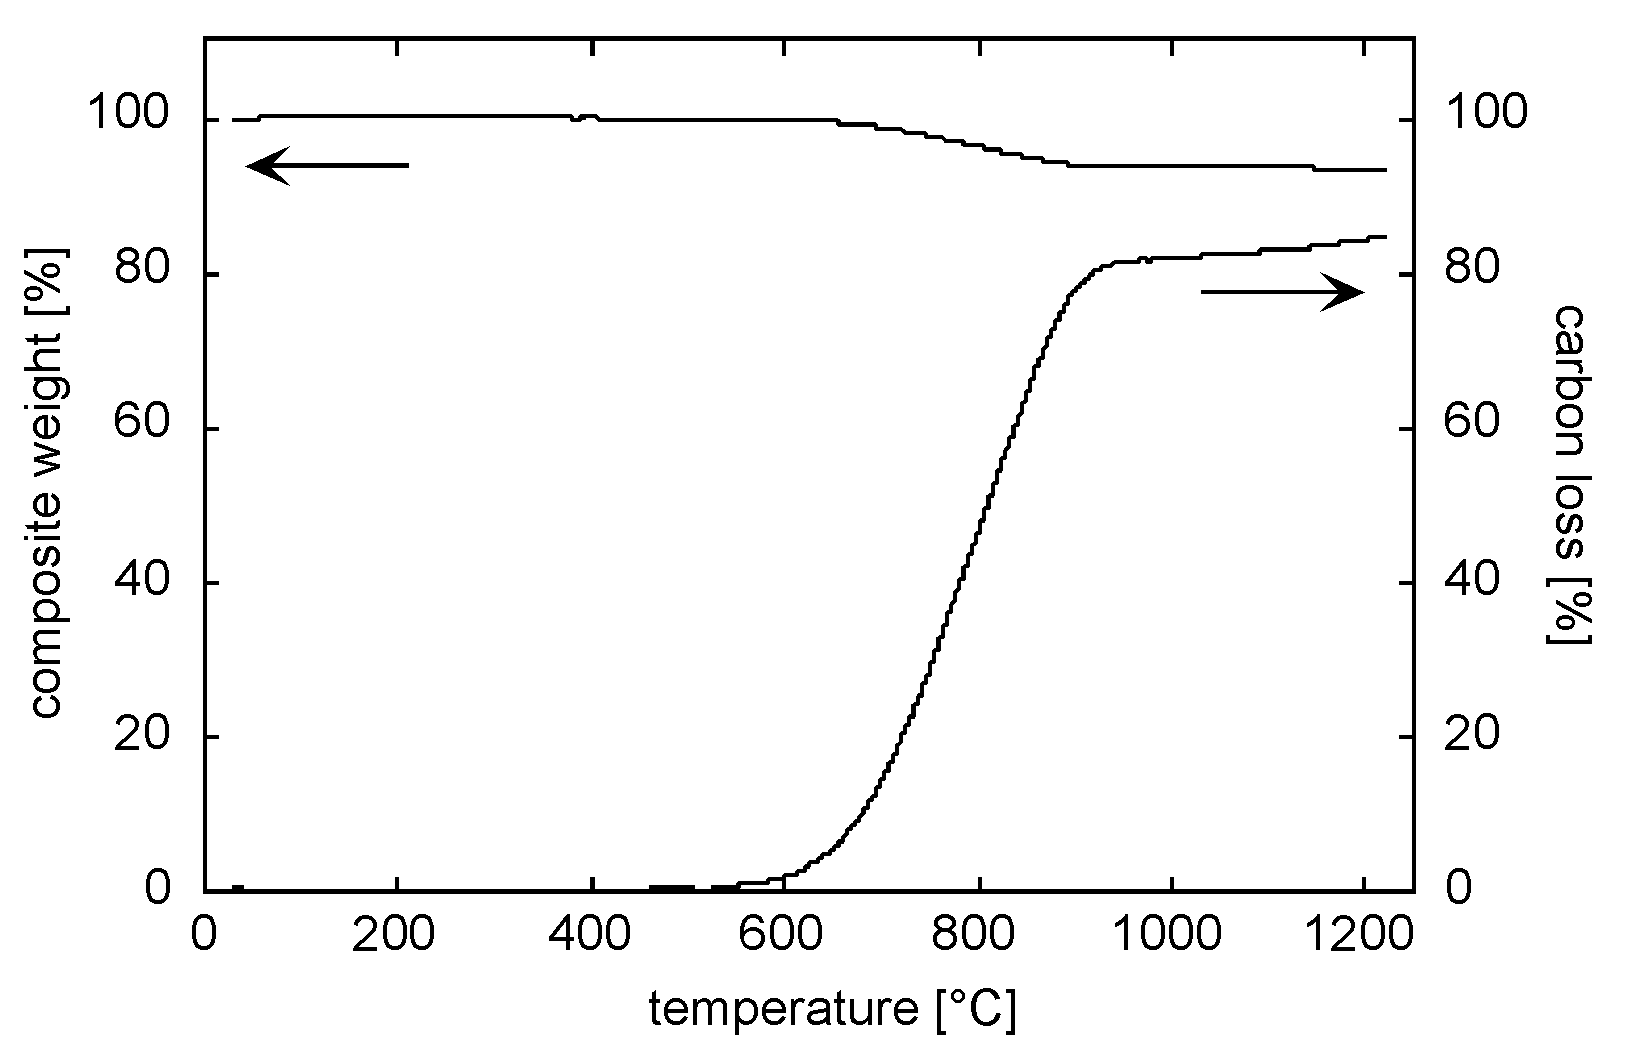


The TGA plot shows the upper curve as the total weight loss, whereas the other plot represents the total carbon loss relative to the total C-content exhibiting saturation at *ca.* 84 %.


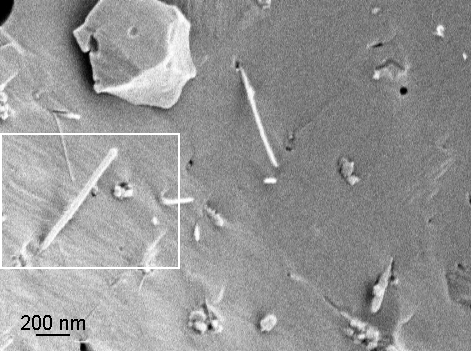


This SEM image depicts a cracked surface of the MWNT/SiOx composite after the TGA measurement (carried out up to 1220 °C) of this particular sample. It is noteworthy that the coated tubes have survived oxidation, fact that is commensurate with the TGA curve.

** Mechanical Properties*

4-point bending tests of the bulk MWNT/SiOx composite revealed a bending strength between 10 and 24 MPa and a Young’s-modulus of *ca.* 31 GPa. We believe that these values can be enhanced further if the MWNT-content is increased and the microstructure of the matrix optimised.
